# Supplementary material for: STING facilitates the development of radiation-induced lung injury via regulating the PERK/eIF2α pathway
Source: PubMed Central journal article supplement — Transl Lung Cancer Res. 2024 Nov 21;13(11):3010–25. doi: 10.21037/tlcr-24-649 (PMC11632424; doi:10.21037/tlcr-24-649), 2024-11-21
Supplement: tlcr-13-11-3010-dss.pdf [file tlcr-13-11-3010-dss.pdf]

## Data Sharing Statement

|                     |                                                                                                                                                     |                                                                                                                          |
|---------------------|-----------------------------------------------------------------------------------------------------------------------------------------------------|--------------------------------------------------------------------------------------------------------------------------|
| <b>Article Info</b> | <a href="https://dx.doi.org/10.21037/tlcr-24-649">https://dx.doi.org/10.21037/tlcr-24-649</a>                                                       |                                                                                                                          |
| <b>Item</b>         | <b>Question</b>                                                                                                                                     | <b>Authors' Response<br/>(place "-" if not applicable)</b>                                                               |
| 1                   | Would you like to share data collected for your study to others?                                                                                    | Yes.                                                                                                                     |
| 2                   | If not, would you like to share the reason for your decision?                                                                                       | -                                                                                                                        |
| 3                   | What data in particular will be shared?                                                                                                             | All data are available for all researchers.                                                                              |
| 4                   | Any other documents will be shared? Such as study protocol, statistical analysis plan, informed consent form, clinical study report, analytic code. | Protocols will also be shared if requested.                                                                              |
| 5                   | When will data availability begin?                                                                                                                  | From the publication date.                                                                                               |
| 6                   | When will data availability end?                                                                                                                    | Permanent validity.                                                                                                      |
| 7                   | To whom will you share the data?                                                                                                                    | Medical oncologists and radiologist who are interested in studies of RILI.                                               |
| 8                   | For what type of analysis or purpose?                                                                                                               | For analysis to evaluate the direction of diagnosis and treatment of RILI.                                               |
| 9                   | How or where can the data/documents be obtained?                                                                                                    | The shared data were available through contacting the corresponding author on reasonable request:<br>huyi301zlx@sina.com |
| 10                  | Any other restrictions?                                                                                                                             | We may balance the potential benefits and risks for each request and then provide the data that could be shared.         |
