# Supplementary material for: STING facilitates the development of radiation-induced lung injury via regulating the PERK/eIF2α pathway
Source: PubMed Central journal article supplement — Transl Lung Cancer Res. 2024 Nov 21;13(11):3010–25. doi: 10.21037/tlcr-24-649 (PMC11632424; doi:10.21037/tlcr-24-649), 2024-11-21
Supplement: tlcr-13-11-3010-supplementary.pdf [file tlcr-13-11-3010-supplementary.pdf]

## Supplementary

**Table S1** The sequence of siRNA used for transfection were as follows

| Gene                 | Sequence (5'-3')      |
|----------------------|-----------------------|
| <i>TMEM173</i> siRNA | CCACUGUAUGGCUAUGAUUTT |

siRNA, small interfering RNA.

**Table S2** The primers used for real-time PCR analysis were listed

| Gene                            | Forward (5'-3')          | Reverse (5'-3')          |
|---------------------------------|--------------------------|--------------------------|
| <i><math>\alpha</math>-SMA</i>  | CATGGTTCATTGTGGCCGAGCTGT | TCGGCCTTTGGTCTCAGGGACTTT |
| <i>Fibronectin-1</i>            | CGGTGGCTGTCAGTCAAAG      | AAACCTCGGCTTCCTCCATAA    |
| <i>ZEB1</i>                     | GCCAGCAGTCATGATGAAAA     | TATCACAATACGGGCAGGTG     |
| <i><math>\beta</math>-actin</i> | TGCTGTCCCTGTATGCCTCT     | TTTGATGTCACGCACGATTT     |

PCR, polymerase chain reaction.
